# Supplementary material for: Human saliva, plasma and breast milk exosomes contain RNA: uptake by macrophages
Source: Springer Nature journal article supplement (doi:10.1186/1479-5876-9-9), 2011-01-14

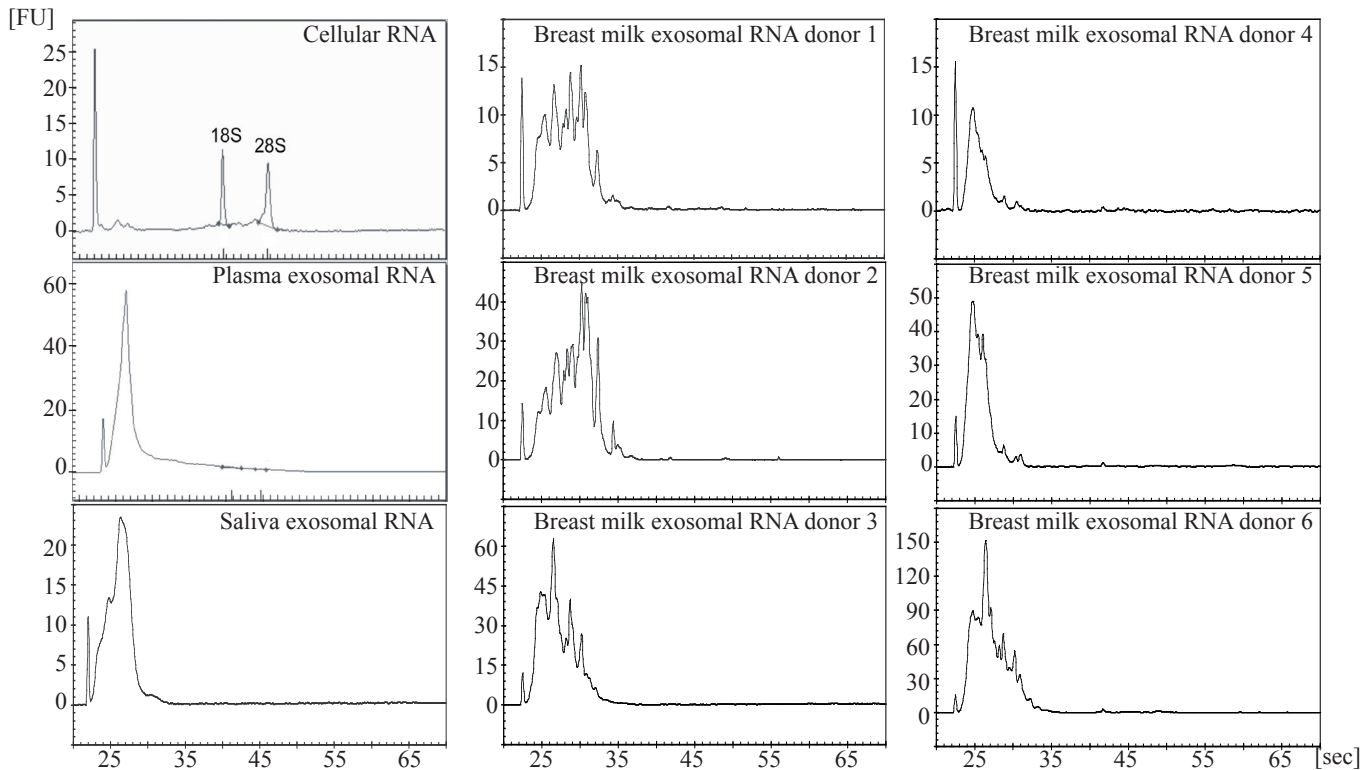

Supplement: 12967_2010_667_MOESM4_ESM.pdf [file 12967_2010_667_MOESM4_ESM.pdf]
